# Supplementary material
Source: PubMed Central journal article supplement (PMC4695377)
Supplement: NIHMS738565-supplement-2.pdf [file NIHMS738565-supplement-2.pdf]

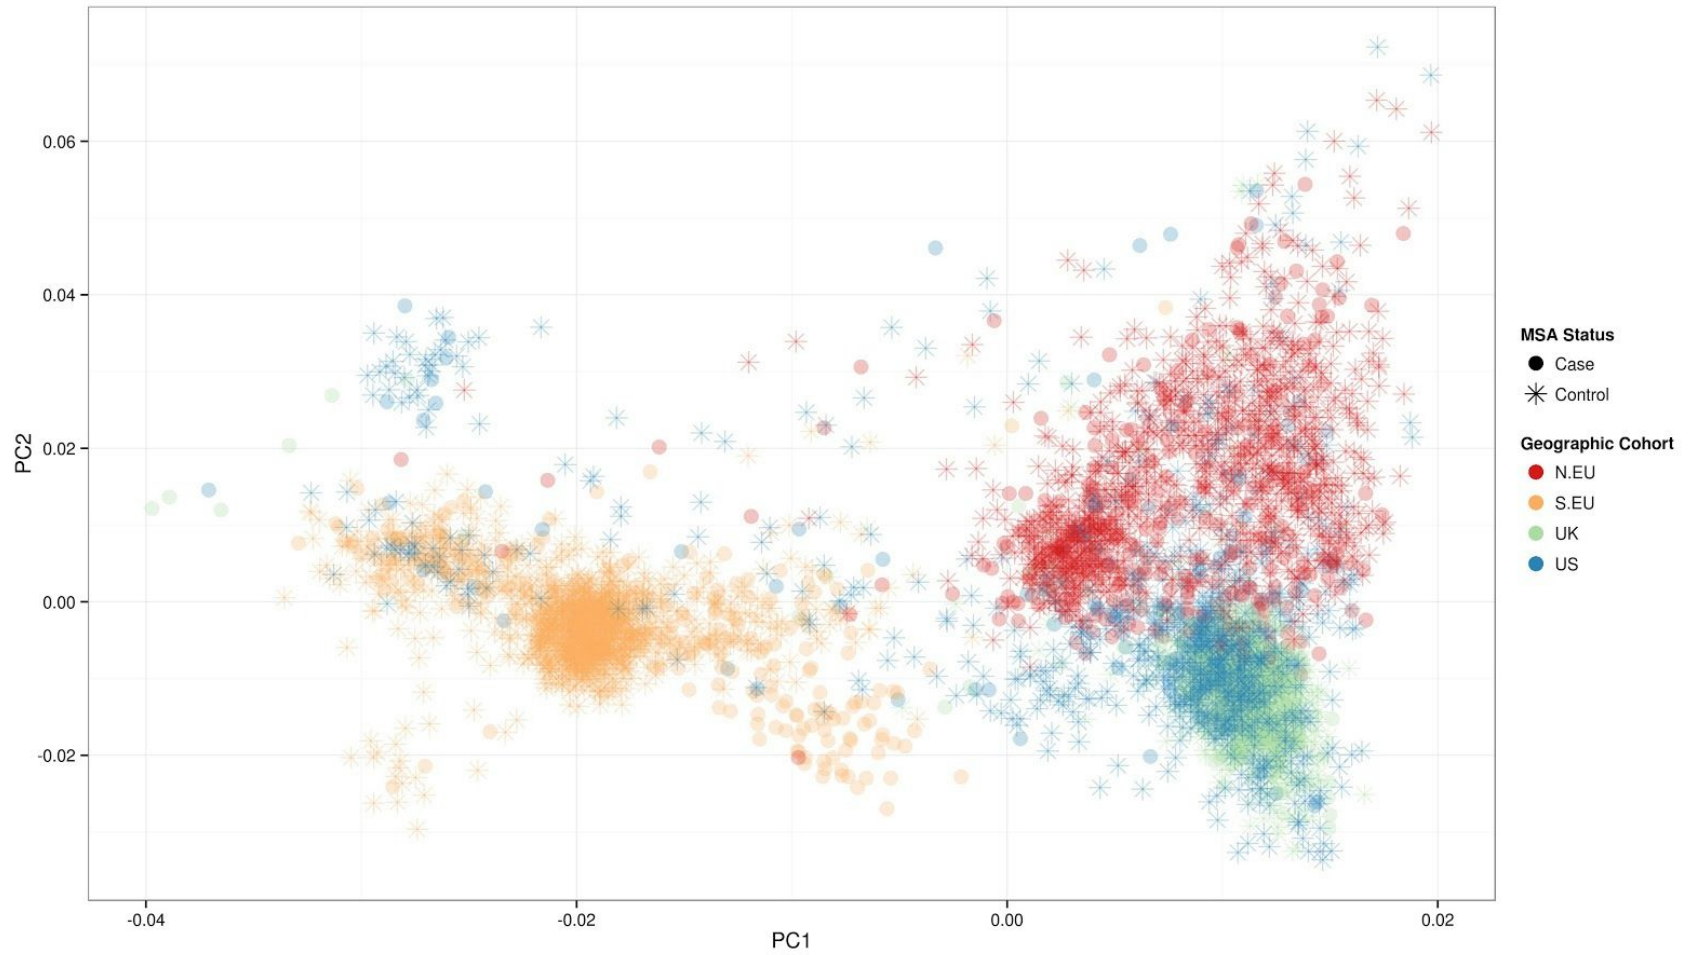

**Figure S1: Population stratification using the top two principal components from genotyped SNPs demonstrates that MSA cases and controls cluster together with respect to their geographic cohort.**
